# Supplementary material for: AON-induced splice-switching and DMPK pre-mRNA degradation as potential therapeutic approaches for Myotonic Dystrophy type 1
Source: PubMed Central journal article supplement — Nucleic Acids Res. 2020 Jan 22;48(5):2531–43. doi: 10.1093/nar/gkaa007 (PMC7049696; doi:10.1093/nar/gkaa007), 2020-01-22
Supplement: gkaa007_supplemental_file.pdf [file gkaa007_supplemental_file.pdf]

## SUPPLEMENTARY DATA

### **AON-induced splice-switching and *DMPK* pre-mRNA degradation as potential therapeutic approaches for Myotonic Dystrophy type 1**

Ewa Stepniak-Konieczna<sup>1\*</sup>, Patryk Konieczny<sup>2</sup>, Piotr Cywoniuk<sup>1</sup>, Julia Dluzewska<sup>1</sup>, and Krzysztof Sobczak<sup>1\*</sup>

<sup>1</sup>Department of Gene Expression, Institute of Molecular Biology and Biotechnology, Faculty of Biology, Adam Mickiewicz University in Poznan, Uniwersytetu Poznanskiego 6, 61-614 Poznan, Poland

<sup>2</sup>Department of Integrative Genomics, Institute of Anthropology, Faculty of Biology, Adam Mickiewicz University in Poznan, Uniwersytetu Poznanskiego 6, 61-614 Poznan, Poland

\*To whom correspondence should be addressed: Tel.: +4861 829 5958; Fax: +4861 829 5949; Email: [ksobczak@amu.edu.p](mailto:ksobczak@amu.edu.p)

Correspondence may also be addressed to: [esk@amu.edu.pl](mailto:esk@amu.edu.pl)

## **LIST OF SUPPLEMENTARY DATA**

### **SUPPLEMENTARY MATERIALS AND METHODS**

**Assessment of cell viability and AONs toxicity.**

### **SUPPLEMENTARY FIGURES**

**Supplementary Figure S1.** Graphical output of exonic splicing enhancer (ESE) analyses within *DMPK* e5, e9 and e15.

**Supplementary Figure S2.** AONs complementary to sequences within *DMPK* e5, e9 and e15 induce efficient skipping of targeted exons in non-DM1 and DM1 fibroblasts.

**Supplementary Figure S3.** LNA-PS AONs targeting e5 and e15 induce weaker exon skipping compared to their 2'-Ome-PS equivalents.

**Supplementary Figure S4.** AON-mediated exclusion of e5 and e9 fails to reduce *DMPK* mRNA.

**Supplementary Figure S5.** Antisense gapmers complementary to *DMPK* intron 14 efficiently reduce *DMPK* mRNA.

**Supplementary Figure S6.** 2'-Ome-PS-modified AONs aggravate pre-existing DM1-spliceopathy.

**Supplementary Figure S7.** LNA-PS equivalents of 2'-Ome-PS splice-switching AONs do not affect alternative splicing events in non-DM1 fibroblasts.

### **SUPPLEMENTARY TABLES**

**Supplementary Table 1.** Summary of AONs used in this study.

**Supplementary Table 2.** Tabular output of ESE analyses within *DMPK* e5, e9 and e15.

**Supplementary Table 3.** PCR primers used for alternative splicing assays and gene expression analyses.

## **SUPPLEMENTARY MATERIALS AND METHODS**

### **Assessment of cell viability and AONs toxicity**

Viability of cells upon experimental manipulation and dosing with AONs was performed using CellTox™ Green Cytotoxicity Assay (Promega) per manufacturer's recommended protocol. Assay was performed in non-DM1 fibroblasts 48h post transfection with 75 nM of distinct AONs targeting the same core sequence within e5, but differing in backbone chemistries (Supplementary Figure S3C).

**SUPPLEMENTARY FIGURES**

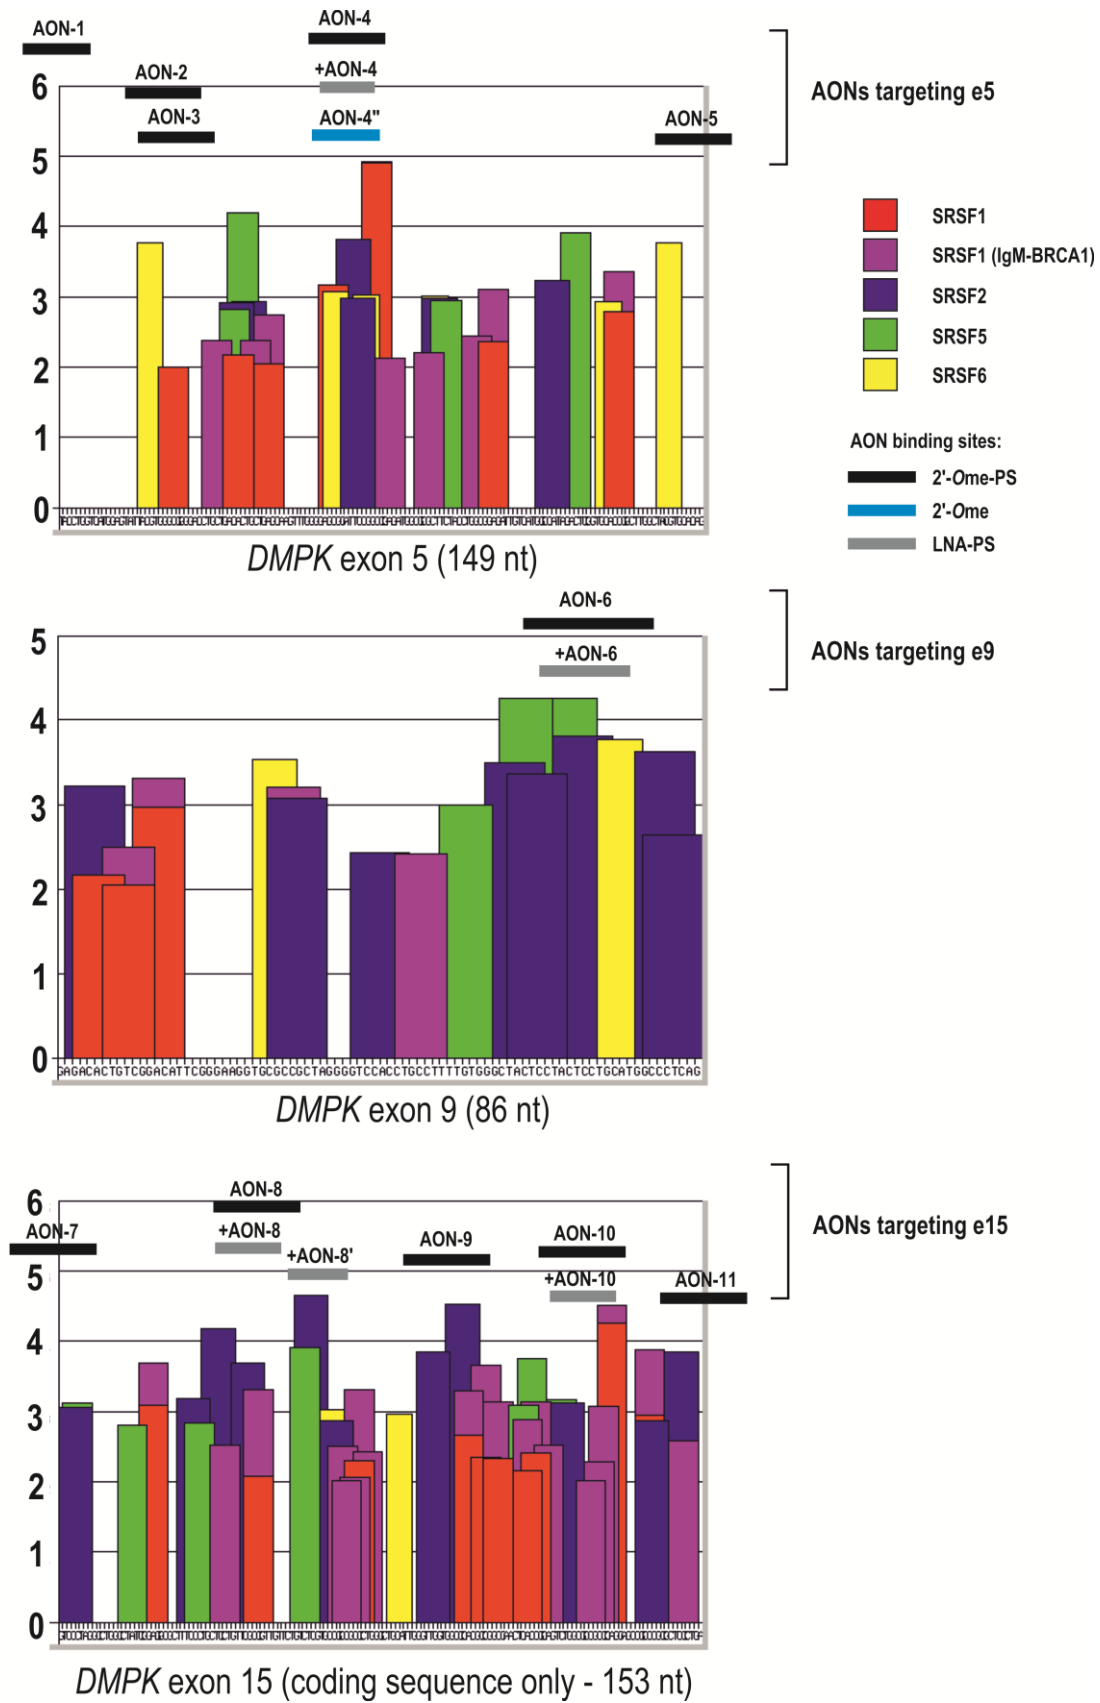

**Supplementary Figure S1.**

**Supplementary Figure S1.**

**Graphical output of exonic splicing enhancer (ESE) analyses within *DMPK* e5, e9 and e15.** The analyzed exonic sequence is reproduced along the X-axis. Putative binding sites for distinct serine/arginine-rich proteins (SRSF) are represented by bars. The height of the bars represents the motif scores, and the width of the bars indicates the length of the motif (6, 7 or 8 nucleotides). Different SRSF protein high-scores are color-coded as illustrated in the legend. Approximate AON binding sites within targeted exons are represented as horizontal lines indicated in the legend.

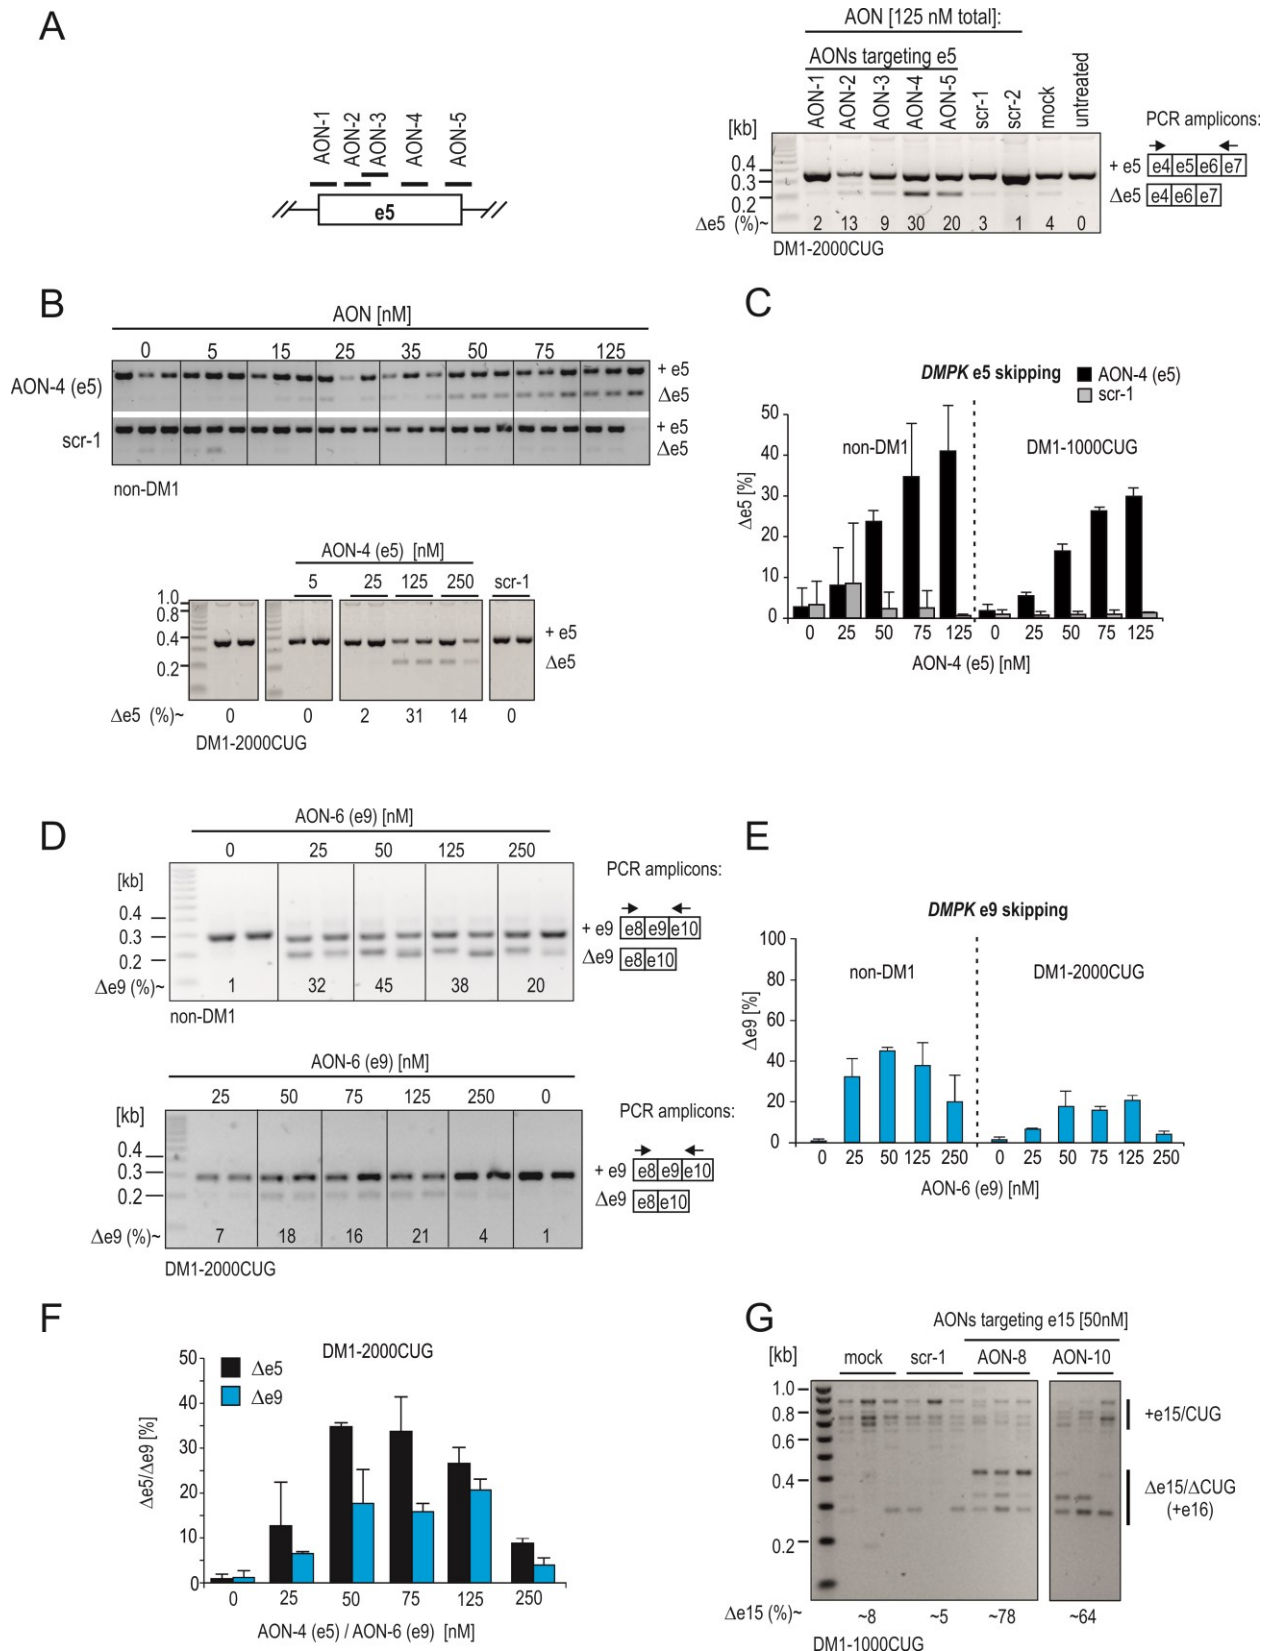

**Supplementary Figure S2.**

**AONs complementary to sequences within *DMPK* e5, e9 and e15 induce efficient skipping of targeted exons in non-DM1 and DM1 fibroblasts. (A)** Schematic representation of AON binding sites within e5 and representative RT-PCR gel showing e5 skipping in DM1-2000CUG fibroblasts transfected

with 125 nM of indicated AONs.  $\Delta e5$  (%) indicates percent e5 spliced out. **(B)** Representative RT-PCR analysis of e5 skipping in non-DM1 (top) vs DM1-2000CUG fibroblasts (bottom) transfected with indicated amounts of AON-4 targeting e5, or control scrambled sequence AON (scr-1). **(C)** Quantitation of e5 skipping efficiency in non-DM1 vs DM1-1000CUG fibroblasts transfected with increasing amounts of indicated AONs. **(D)** Representative RT-PCR analyses of AON-6-induced e9 skipping in control (top) and DM1 fibroblasts (bottom). PCR amplicons are indicated and  $\Delta e9$  (%) refers to the percentage of e9 spliced out. **(E)** Quantitation of results shown in (D). **(F)** RT-PCR-based quantitation of e5 and e9 skipping in DM1 fibroblasts treated with AON-4 and AON-6 at the same time. **(G)** Representative RT-PCR gel image showing e15/CUG skipping in DM1-1000CUG fibroblasts dosed with indicated AONs.

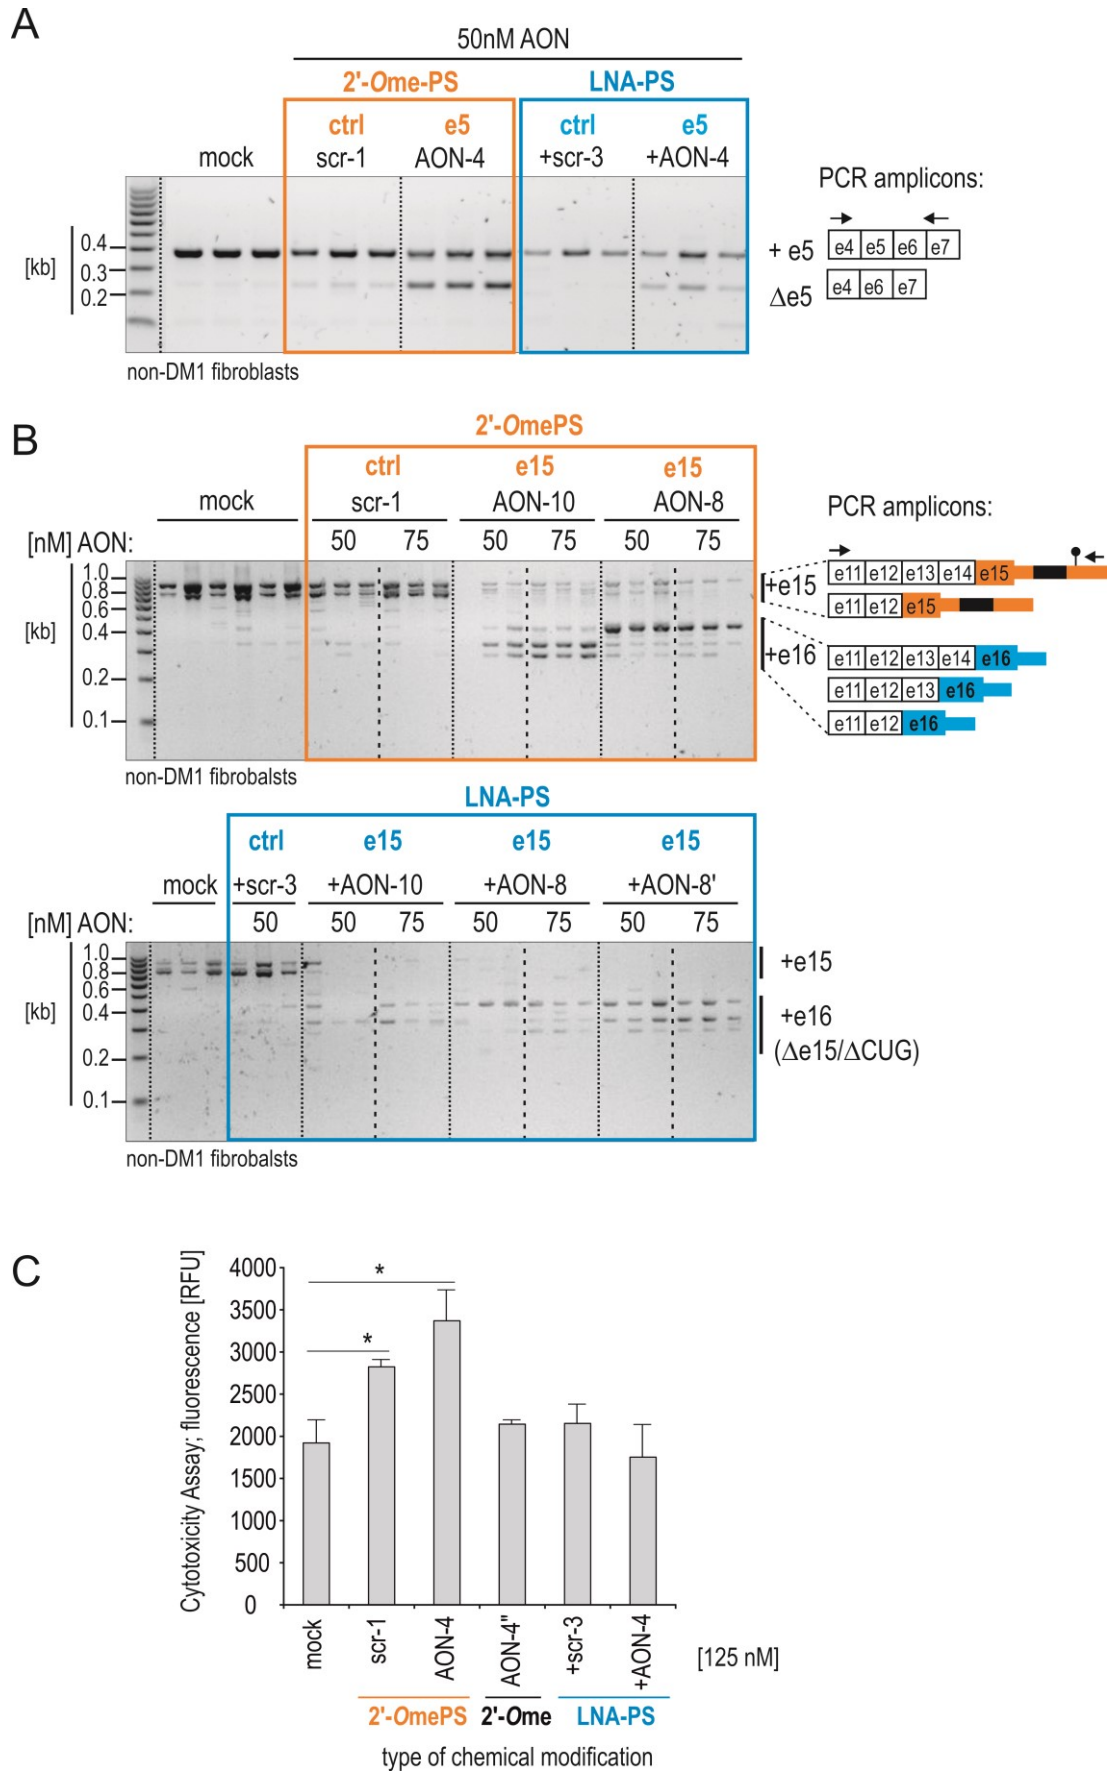

**Supplementary Figure S3.**



**Supplementary Figure S3.**

**LNA-PS AONs targeting e5 and e15 induce weaker exon skipping compared to their 2'-Ome-PS equivalents. (A-B)** Representative images of RT-PCR comparing e5 (A) and e15 (B) skipping in non-DM1 fibroblasts transfected with indicated amounts of 2'-Ome-PS (orange) or equivalent LNA-PS (blue) AONs targeting the same core sequences within *DMPK* e5 (A) or e15 (B). Scrambled AONs scr-1 and +scr-3 with appropriate chemical modifications were used as controls. *DMPK* splice isoforms and primer locations are indicated to the right of gel images. AON sequences are listed in Supplementary Table 1, and schematic of AON binding sites within targeted exon is shown in Supplementary Figure 1. **(C)** Quantitation of cell viability/cytotoxicity in non-DM1 fibroblasts treated with 75nM of e5 targeting AON-4. Chemical modifications are indicated. AON-4, AON-4'' and +AON-4 target the same core sequence within e5.

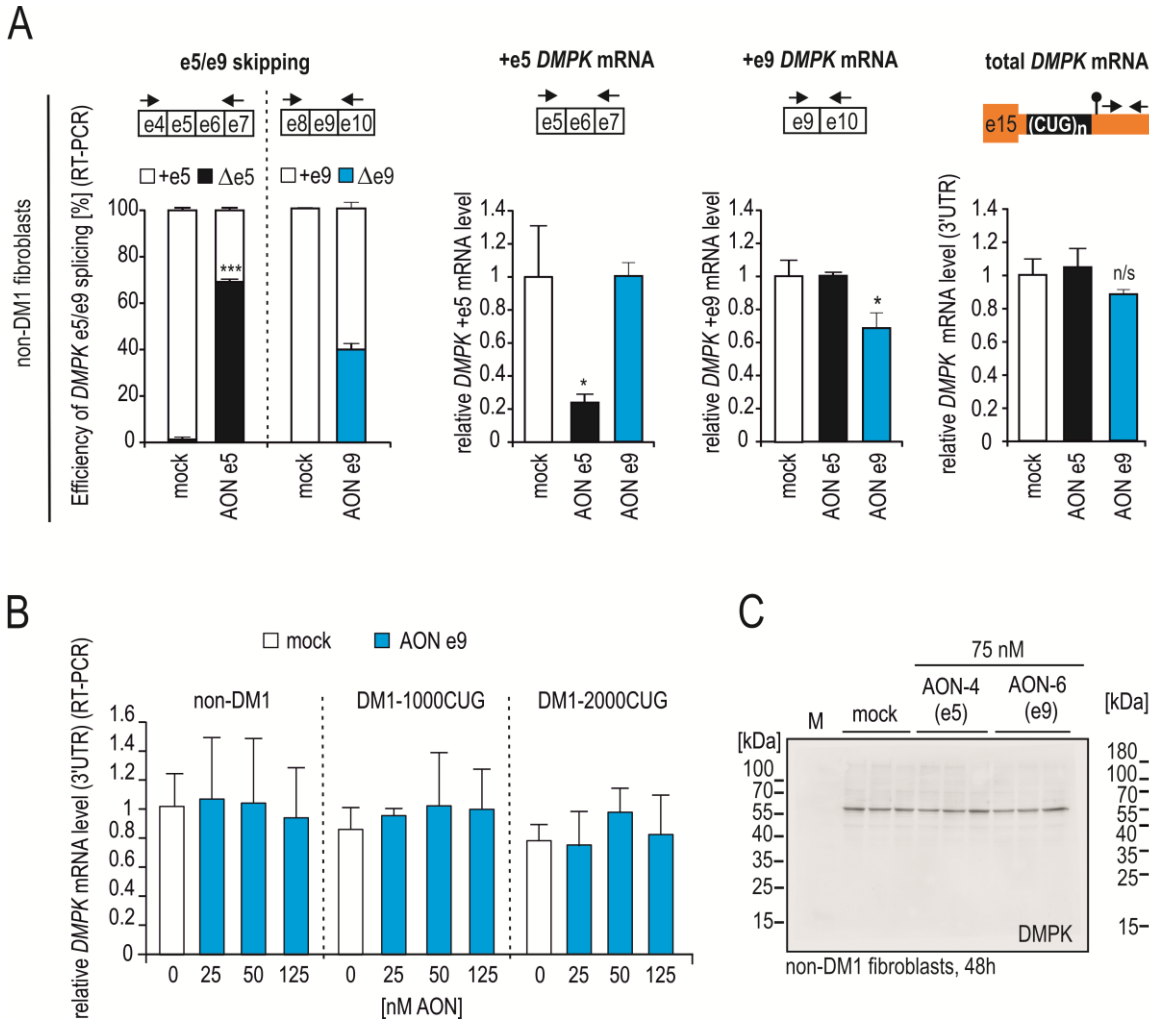

#### Supplementary Figure S4.

**AON-mediated exclusion of e5 and e9 fails to reduce *DMPK* mRNA.** (A) RT-PCR-based quantitation of e5 or e9 skipping efficiency, e5-containing *DMPK* mRNA (+e5 *DMPK* mRNA), e9-containing *DMPK* mRNA (+e9 *DMPK* mRNA) and total *DMPK* mRNA (3'UTR) in control non-DM1 primary fibroblasts treated with indicated amounts of AONs directed at e5 (AON-4) and e9 (AON-6). Schematics of PCR amplicons are indicated. (B) RT-PCR quantitation of total *DMPK* mRNA (amplicon within 3'UTR) demonstrates lack of *DMPK* transcript reduction upon e9 skipping in control and indicated DM1 fibroblasts. *DMPK* expression is shown relative to *GAPDH* and increasing doses of AON e9 (AON-6) are indicated. (C) Whole-membrane scan of western blot analysis showing unaffected *DMPK* protein level in non-DM1 fibroblasts dosed with 75 nM of indicated AONs directed at e5 (AON-4) and e9 (AON-6). Low exposition (left) and high exposition (right) images of the same western blot analysis are shown to visualize protein ladder (M) and lack of detectable truncated protein isoforms. Three lanes indicate individual samples.

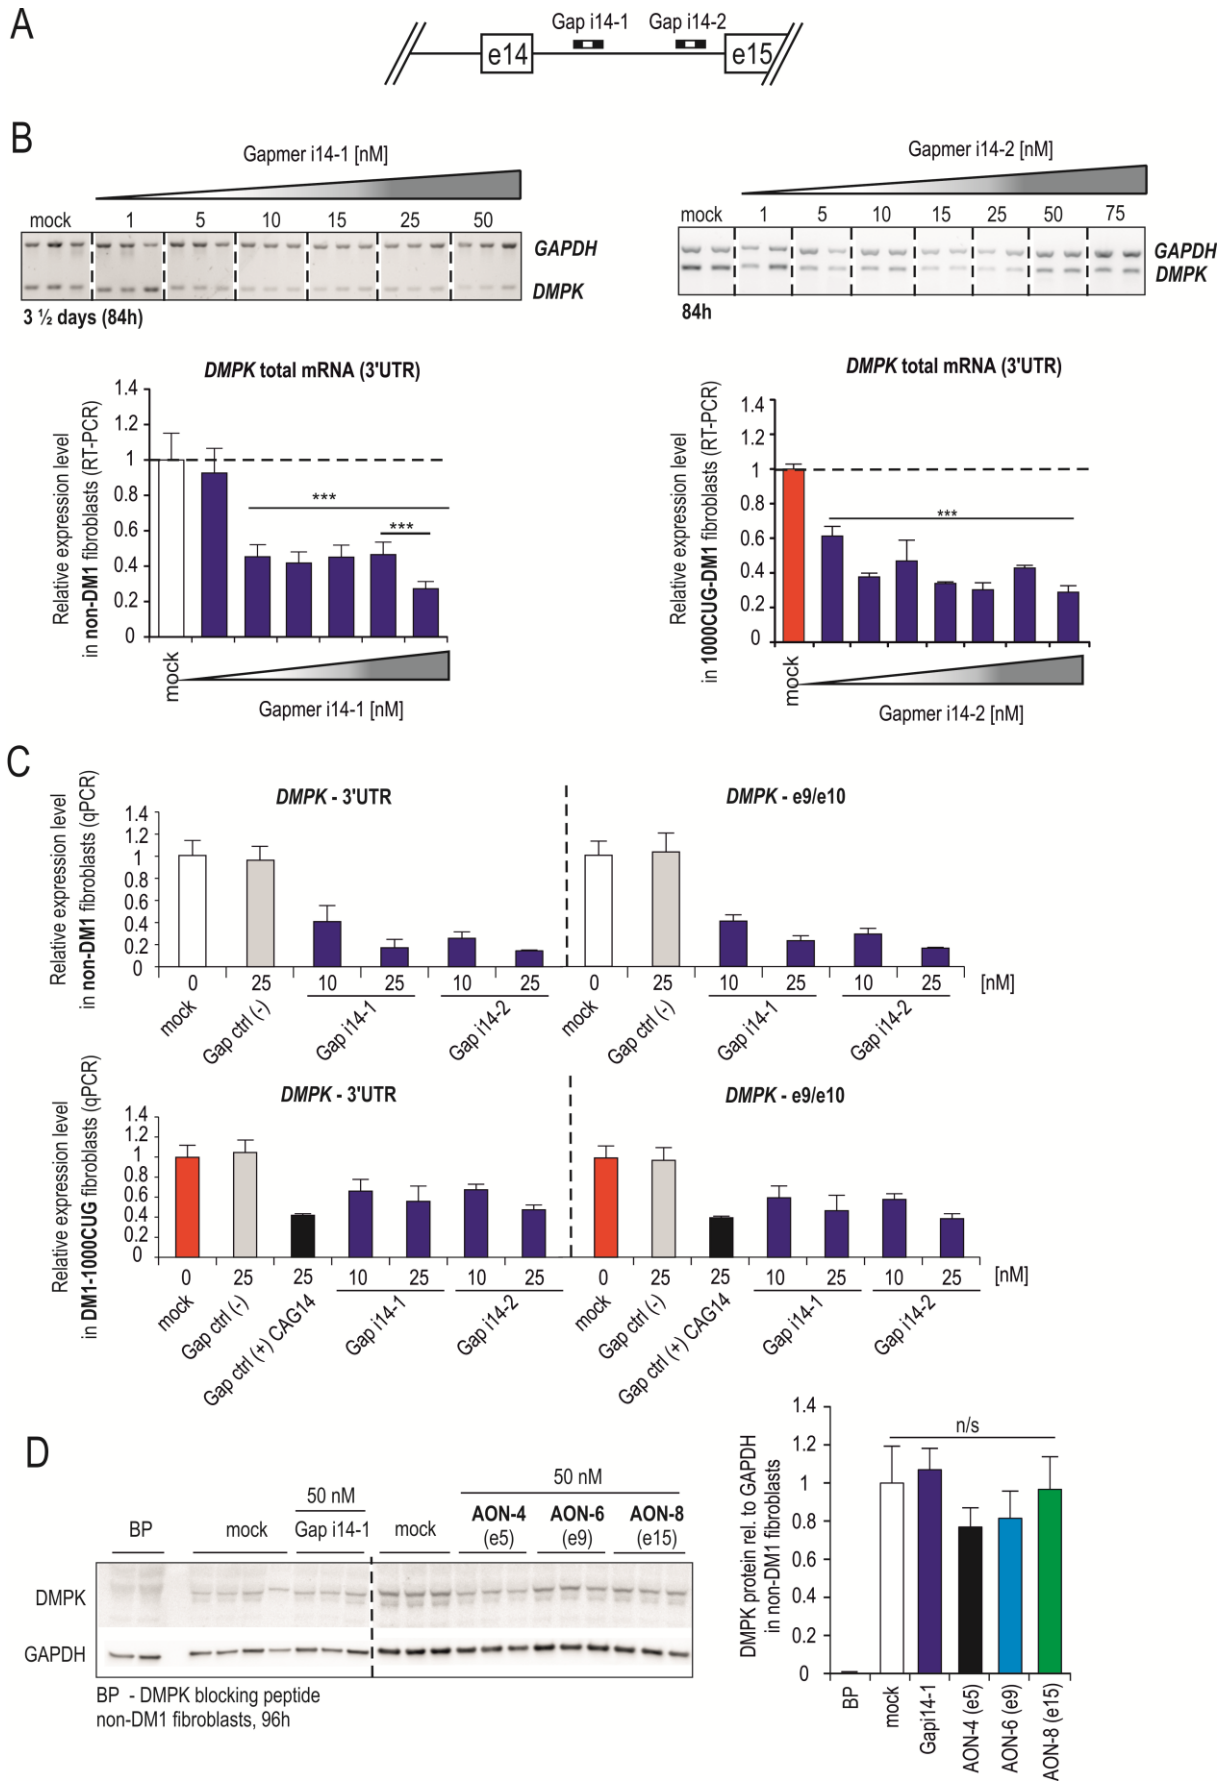

Supplementary Figure S5.

**Supplementary Figure S5.**

**Antisense gapmers complementary to *DMPK* intron 14 efficiently reduce *DMPK* RNA. (A)** Schematic representation of distinct regions within *DMPK* intron 14 (i14) targeted by antisense gapmers Gap i14-1 and Gap i14-2. White boxes indicate exons, horizontal line indicates i14, approximate gapmer binding sites are depicted. **(B)** Representative RT-PCR gels (top) and quantitations (bottom) of total *DMPK* mRNA in unaffected (left panel) vs DM1-affected (right panel) human fibroblasts treated with indicated amounts of Gap i14-1 (left panel) and Gap i14-2 (right panel) for 3 ½ days. Gapmer dose increment is indicated with triangles. **(C)** qPCR (real-time PCR) – based quantitation of *DMPK* transcript level in non-DM1 (top) vs DM1-affected (bottom) human fibroblasts 72h after dosing the cells with indicated gapmer-AONs. Quantitation is based on analyses of two distinct amplicons across *DMPK* transcript: 3'UTR (left) or internal region spanning e9 through e10 (right). Grey bars indicate negative control – scrambled sequence gapmer-AON, black bars indicated positive control – gapmer-AON targeting CUG-repeat region. **(D)** Representative immunoblot showing lack of *DMPK* protein reduction in non-DM1 fibroblasts 96h post transfection with indicated AONs. Note that no protein reduction is detectable even after dosing the cells with gapmer AON. Antibody blocking peptide (BP) was used as a negative control.

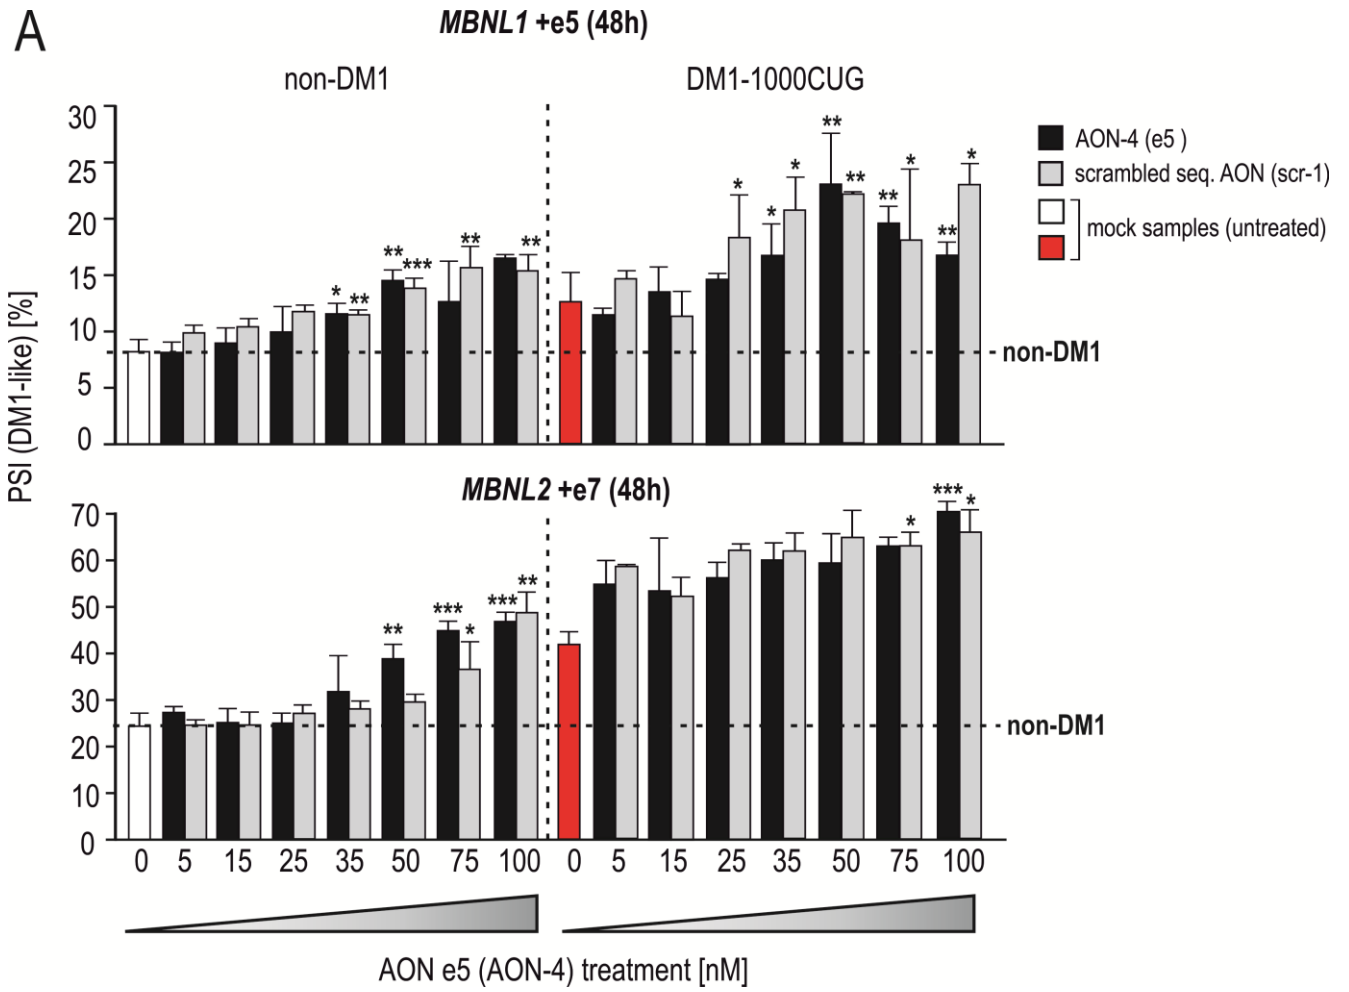

Supplementary Figure S6.

**B**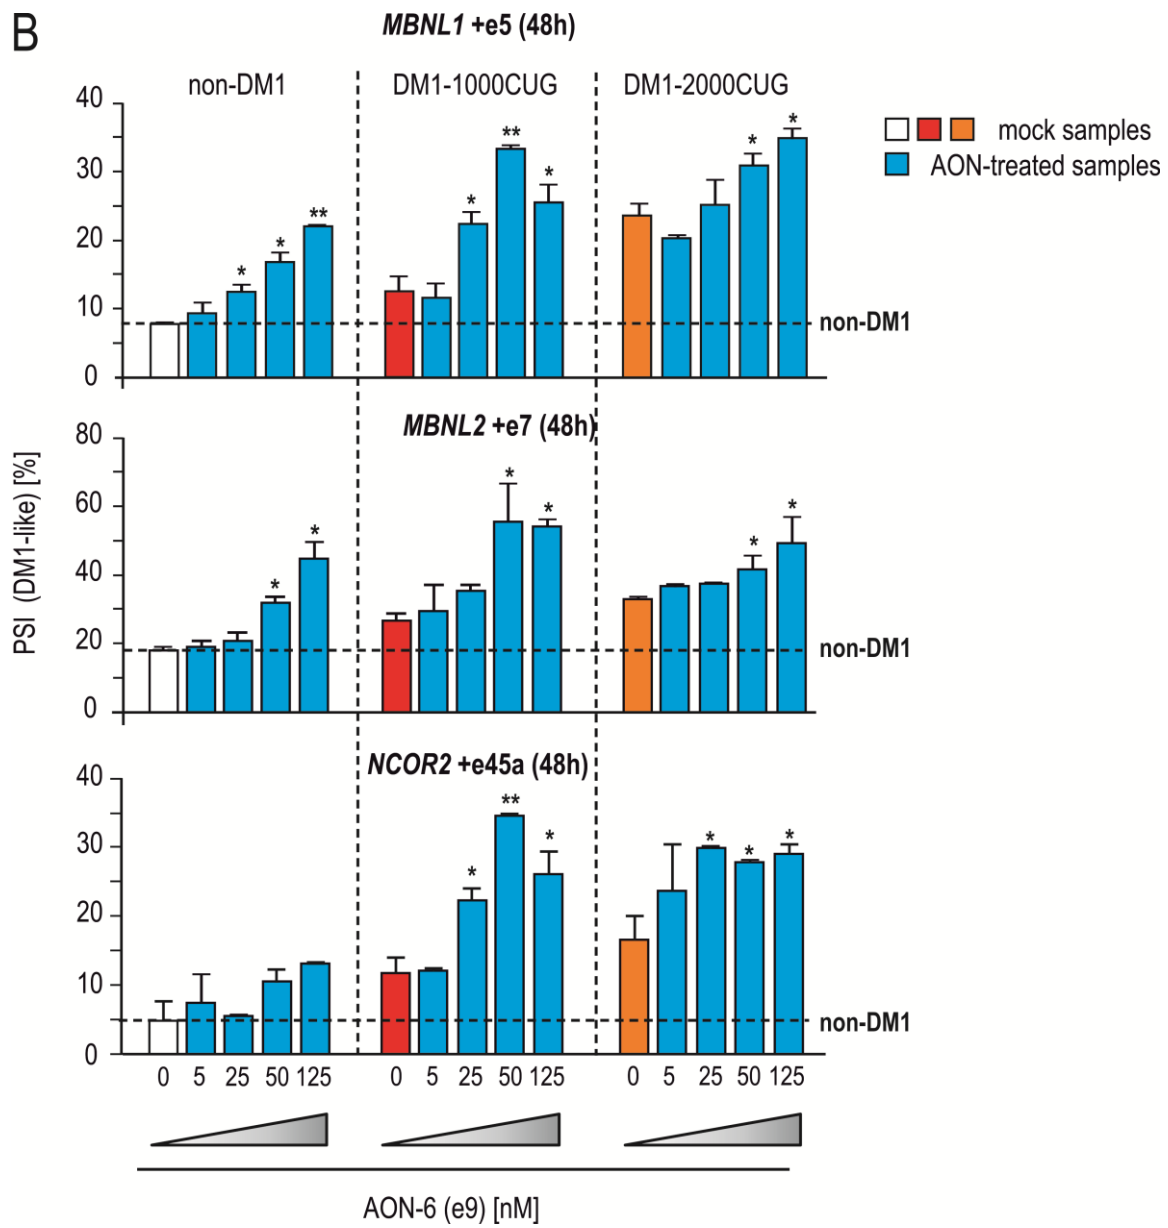**Supplementary Figure S6.**

C

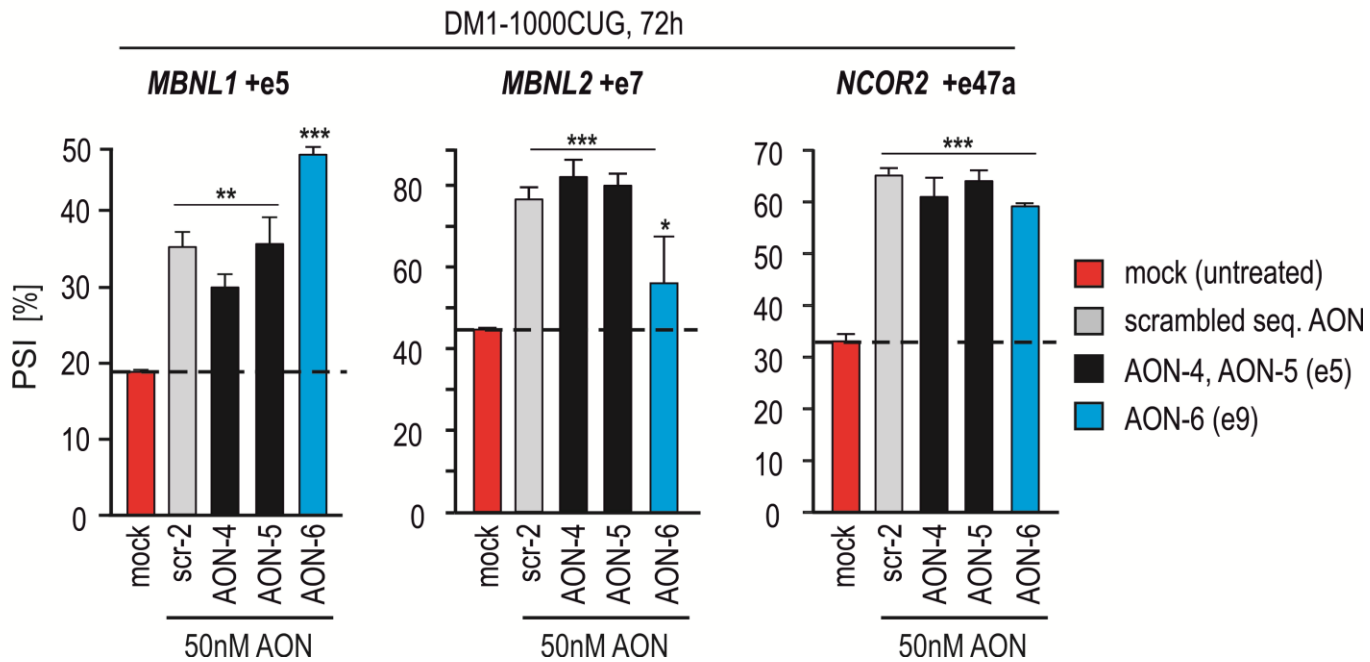

**Supplementary Figure S6.**

**2'-Ome-PS-modified AONs aggravate pre-existing DM1-spliceopathy.** RT-PCR-based quantitation of splicing changes in the alternative exons of established DM1-biomarker transcripts: *MBNL1*, *MBNL2*, and *NCOR2* in control (non-DM1) and DM1 fibroblasts (DM1-1000CUG and DM1-2000CUG) dosed with increasing amounts of indicated AONs targeting e5 (**A, C**) or e9 (**B, C**). Dose increment is depicted with triangles, and exact AON amounts are indicated. Increasing percentages of alternative exons inclusion (PSI) observed in (A-C) upon increasing doses of AONs directed at e5 and e9 indicate a DM1-like splicing shift of a given alternative exon (compare mock samples in non-DM1 vs DM1 cells). Time-points post AON treatment are indicated. Horizontal dashed lines mark the percentage of alternative exon inclusion in mock (lipofectamine) controls. Statistical significance compared to respective mock controls is indicated.

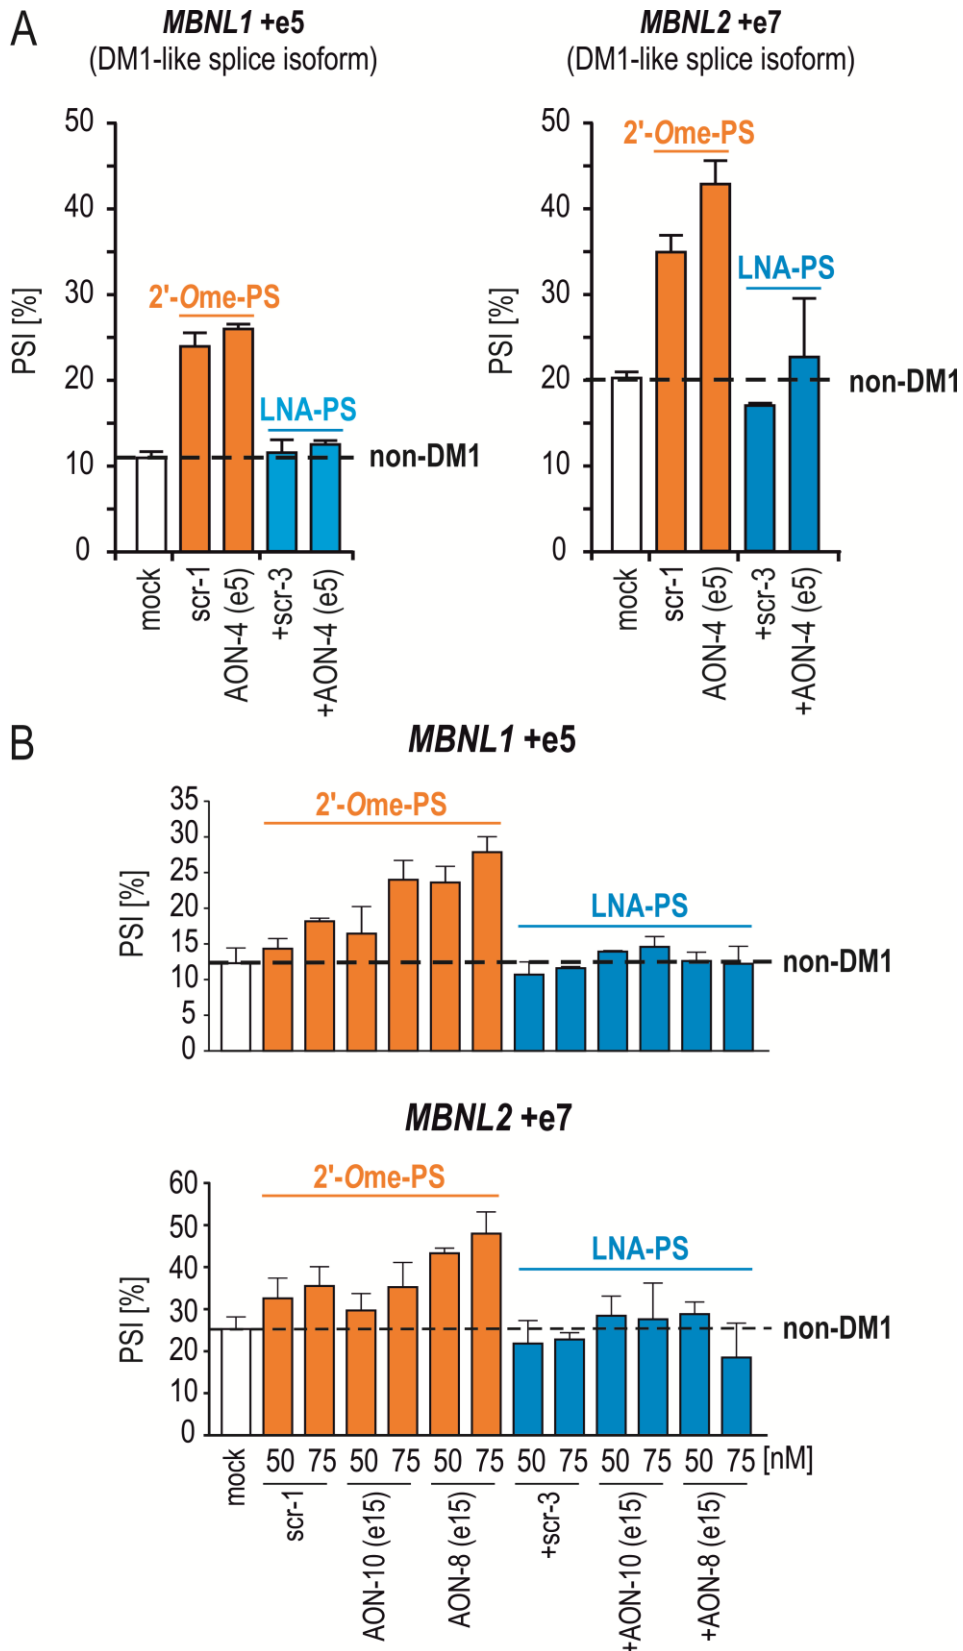

**Supplementary Figure S7.**

**LNA-PS equivalents of 2'-Ome-PS splice-switching AONs do not affect alternative splicing events in non-DM1 fibroblasts. (A-B)** Quantitation of DM1-like splicing shift (alternative exon inclusion; PSI) in



the alternative exons of indicated DM1 biomarkers in non-DM1 fibroblasts 48h post transfection with indicated amounts of AONs targeting the same core sequence within e5 (A) or e15 (B), but harboring distinct chemical modification – either 2'-Ome-PS (orange) or LNA-PS (blue). 2'-Ome-PS- and LNA-PS-modified scrambled sequence AONs were used as chemistry controls (scr-1 and +scr-3, respectively).

**SUPPLEMENTARY TABLES**

**2'-O me-PS AONs**

| AON name                                   | target exon (e) / intron (i) ‡ | sequence 5'-3'                                                                         | length (nt) |
|--------------------------------------------|--------------------------------|----------------------------------------------------------------------------------------|-------------|
| <b>SPLICE-SWITCHING AONs TARGETING e5</b>  |                                |                                                                                        |             |
| AON-1                                      | e5 -15/+10                     | mU* mG* mA* mC* mC* mA* mG* mG* mU* mA* mC* mU* mG* mA* mG* mA* mA* mG* mG* mG* mG*    | 25          |
| AON-2                                      | e5 +20+41                      | mG* mU* mC* mA* mG* mC* mA* mG* mG* mU* mC* mC* mC* mC* mG* mC* mC* mC* mA* mC* mG* mU | 22          |
| AON-3                                      | e5 +22+43                      | mG* mU* mG* mU* mC* mA* mG* mC* mA* mG* mG* mU* mC* mC* mC* mC* mG* mC* mC* mC* mA* mC | 22          |
| AON-4                                      | e5 +60+81                      | mC* mA* mU* mC* mU* mC* mG* mG* mC* mC* mG* mG* mA* mA* mU* mC* mC* mG* mC* mU* mC* mC | 22          |
| AON-5                                      | e5 +135+149/-7                 | mC* mA* mC* mC* mC* mA* mC* mC* mU* mG* mU* mG* mC* mA* mC* mG* mU* mA* mG* mC* mC* mA | 22          |
| <b>SPLICE-SWITCHING AONs TARGETING e9</b>  |                                |                                                                                        |             |
| AON-6                                      | e9 +63+80                      | mG* mC* mC* mA* mU* mG* mC* mA* mG* mG* mA* mG* mU* mA* mG* mG* mA* mG                 | 18          |
| <b>SPLICE-SWITCHING AONs TARGETING e15</b> |                                |                                                                                        |             |
| AON-7                                      | e15 -15/+10                    | mG* mC* mC* mU* mA* mG* mG* mG* mA* mC* mC* mU* mG* mC* mG* mG* mG* mG* mA* mG* mA*    | 25          |
| AON-8                                      | e15 +39+59                     | mG* mA* mC* mA* mG* mA* mA* mC* mA* mA* mC* mG* mG* mC* mG* mA* mA* mC* mA* mG* mG     | 21          |
| AON-9                                      | e15 +92+112                    | mU* mG* mA* mG* mU* mU* mG* mG* mC* mC* mG* mG* mC* mG* mU* mG* mG* mG* mC* mC* mA     | 21          |
| AON-10                                     | e15 +121+141                   | mG* mG* mC* mG* mG* mC* mU* mC* mC* mU* mG* mG* mG* mC* mG* mG* mC* mG* mC* mC* mA     | 21          |
| AON-11                                     | e15 +145+153/-12               | mC* mA* mG* mU* mU* mC* mU* mA* mG* mG* mG* mU* mU* mC* mA* mG* mG* mG* mA* mG* mC     | 21          |
| <b>SCRAMBLED SEQUENCE CONTROL AONs</b>     |                                |                                                                                        |             |
| scr-1                                      | none                           | mG* mC* mC* mU* mC* mG* mA* mC* mC* mU* mA* mU* mC* mG* mC* mG* mC* mC* mU* mC* mA* mG | 22          |
| scr-2                                      | none                           | mG* mA* mG* mA* mA* mC* mG* mA* mA* mC* mA* mA* mC* mG* mA* mG* mC* mG* mG* mC* mA     | 21          |

**2'-Ome AONs**

| AON name                                  | target exon (e) / intron (i) ‡ | sequence 5'-3'                                                    | length (nt) |
|-------------------------------------------|--------------------------------|-------------------------------------------------------------------|-------------|
| <b>SPLICE-SWITCHING AONs TARGETING e5</b> |                                |                                                                   |             |
| AON-4"                                    | e5 +60+81                      | mC mA mU mC mU mC mG mG mC mC mG mG mA mA mU mC mC mG mC mU mC mC | 22          |

**LNA-PS AONs**

| AON name                                   | target exon (e) / intron (i) ‡ | sequence 5'-3'                            | length (nt) |
|--------------------------------------------|--------------------------------|-------------------------------------------|-------------|
| <b>SPLICE-SWITCHING AONs TARGETING e5</b>  |                                |                                           |             |
| +AON-4                                     | e5 +64+77                      | +T*+C*+G*+G*+C*+C*+G*+G*+A*+A*+T*+C*+C*+G | 14          |
| <b>SPLICE-SWITCHING AONs TARGETING e9</b>  |                                |                                           |             |
| +AON-6                                     | e9 +63+76                      | +T*+G*+C*+A*+G*+G*+A*+G*+T*+A*+G*+G*+A*+G | 14          |
| <b>SPLICE-SWITCHING AONs TARGETING e15</b> |                                |                                           |             |
| +AON-8                                     | e15 +39+52                     | +C*+A*+A*+C*+G*+G*+C*+G*+A*+A*+C*+A*+G*+G | 14          |
| +AON-8'                                    | e15 +57+70                     | +C*+G*+G*+C*+G*+G*+C*+A*+C*+G*+A*+G*+A*+C | 14          |
| +AON-10                                    | e15 +125+138                   | +G*+G*+C*+T*+C*+C*+T*+G*+G*+G*+C*+G*+G*+C | 14          |
| <b>SCRAMBLED SEQUENCE CONTROL AON</b>      |                                |                                           |             |
| +scr-3                                     | none                           | +A*+G*+C*+A*+G*+G*+G*+A*+C*+G*+C*+A*+A*+C | 14          |

**LNA-PS/DNA-PS AONs**

| <b>RNase H-COMPATIBLE GAPMER AONs</b> |                                |                                   |    |
|---------------------------------------|--------------------------------|-----------------------------------|----|
| Gap i14-1                             | i14 +67+82                     | A*A*A*T*G*C*G*C*A*G*C*T*A*A*G*C   | 16 |
| Gap i14-2                             | i14 +183+197                   | G*T*T*A*G*T*C*C*A*C*T*C*G*C*A     | 15 |
| Gap ctrl (+) CAG14                    | CUG repeat region; (+) control | +A*+G*+C*A*G*C*A*G*C*A*G*+C*+A*+G | 14 |
| <b>NEGATIVE CONTROL GAPMER AON</b>    |                                |                                   |    |
| Gap ctrl (-)                          | none; (-) control              | G*C*T*C*C*C*T*T*C*A*A*T*C*C*A*A   | 16 |

**Supplementary Table 1.**

**Summary of AONs used in this study.** 5'-3' sequences are shown including 2'-O-methyl (m) and phosphorothioate modifications (\*) as well as locked nucleic acid modifications (+). (‡) Numbers correspond to complementary region within targeted exon relative to the first nucleotide (+1). (/) indicates AONs targeting an intron-exon (-/+ ) or exon-intron (+/-) boundary, respectively.

Note: the position of LNA modifications in Gapmer AONs is proprietary to Exiqon. CAG14 gapmer used as a positive control was described previously (14).

# A

DMPK e5:

TACCTGGTCATGGAGTATTACGTGGGCGGGGACCTGCTGACACTGCTGAGCAAGTTTGGGGAGCGGATTCCGGCCGAGATGGCGCGCTTCTACCTGGCGGAGAT  
TGTCATGGCCATAGACTCGGTGCACCGCTTGGCTACGTGCACAG

| SRSF1<br>threshold: 1.956 |             |         | SRSF1 (IgM-BRCA1)<br>threshold: 1.867 |             |         | SRSF2<br>threshold: 2.383 |              |         | SRSF5<br>threshold: 2.67 |             |         | SRSF6<br>threshold: 2.676 |            |         |
|---------------------------|-------------|---------|---------------------------------------|-------------|---------|---------------------------|--------------|---------|--------------------------|-------------|---------|---------------------------|------------|---------|
| Position*/Site/Score      |             |         | Position*/Site/Score                  |             |         | Position*/Site/Score      |              |         | Position*/Site/Score     |             |         | Position*/Site/Score      |            |         |
| 24 (-126)                 | GGGCG<br>GG | 1.99388 | 34 (-116)                             | CTGCT<br>GA | 2.37079 | 38 (-112)                 | TGACACT<br>G | 2.91892 | 38 (-112)                | TGACA<br>CT | 2.81550 | 19 (-131)                 | TACG<br>TG | 3.76391 |
| 39 (-111)                 | GACACT<br>G | 2.16497 | 43 (-107)                             | CTGCT<br>GA | 2.37079 | 41 (-109)                 | CACTGCT<br>G | 2.93377 | 40 (-110)                | ACACT<br>GC | 4.18642 | 62 (-88)                  | AGCG<br>GA | 3.06999 |
| 46 (-104)                 | CTGAGC<br>A | 2.03848 | 46 (-104)                             | CTGAG<br>CA | 2.73315 | 65 (-85)                  | GGATTCC<br>G | 3.80645 | 87 (-63)                 | CTTCT<br>AC | 2.95219 | 69 (-81)                  | TCCG<br>GC | 3.01803 |
| 61 (-89)                  | GAGCG<br>GA | 3.16789 | 71 (-79)                              | CGGCC<br>GA | 4.91206 | 66 (-84)                  | GATTCCG<br>G | 2.97103 | 117 (-33)                | AGACT<br>CG | 3.90189 | 85 (-65)                  | CGCT<br>TC | 3.00116 |
| 71 (-79)                  | CGGCC<br>GA | 4.90209 | 74 (-76)                              | CCGAG<br>AT | 2.12433 | 85 (-65)                  | CGCTTCT<br>A | 2.98317 |                          |             |         | 125 (-25)                 | TGCA<br>CC | 2.92201 |
| 98 (-52)                  | CGGAGA<br>T | 2.36054 | 83 (-67)                              | CGCGC<br>TT | 2.20838 | 111 (-39)                 | GGCCATA<br>G | 3.22712 |                          |             |         | 139 (-11)                 | TACG<br>TG | 3.76391 |
| 127 (-23)                 | CACCG<br>GC | 2.78479 | 94 (-56)                              | CTGGC<br>GG | 2.43327 |                           |              |         |                          |             |         |                           |            |         |
|                           |             |         | 98 (-52)                              | CGGAG<br>AT | 3.10259 |                           |              |         |                          |             |         |                           |            |         |
|                           |             |         | 127 (-23)                             | CACCG       | 3.36278 |                           |              |         |                          |             |         |                           |            |         |

# B

DMPK e9: GAGACACTGTCCGACATTCGGGAAGGTGCGCCGCTAGGGTCCACCTGCCTTTTGTGGGCTACTCCTACTCCTGCATGGCCCTCAG

| SRSF1<br>threshold: 1.956 |             |         | SRSF1 (IgM-BRCA1)<br>threshold: 1.867 |             |         | SRSF2<br>threshold: 2.383 |              |         | SRSF5<br>threshold: 2.67 |             |         | SRSF6<br>threshold: 2.676 |            |         |
|---------------------------|-------------|---------|---------------------------------------|-------------|---------|---------------------------|--------------|---------|--------------------------|-------------|---------|---------------------------|------------|---------|
| Position*/Site/Score      |             |         | Position*/Site/Score                  |             |         | Position*/Site/Score      |              |         | Position*/Site/Score     |             |         | Position*/Site/Score      |            |         |
| 3 (-84)                   | GACACT<br>G | 2.16497 | 7 (-80)                               | CTGTC<br>GG | 2.49246 | 2 (-85)                   | AGACACT<br>G | 3.21649 | 52 (-35)                 | TTTGT<br>GG | 2.99502 | 27 (-60)                  | TGCG<br>CC | 3.53067 |
| 7 (-80)                   | CTGTG<br>G  | 2.04268 | 11 (-76)                              | CGGAC<br>AT | 3.31052 | 29 (-58)                  | CGCCGCT<br>A | 3.07557 | 60 (-27)                 | CTACT<br>CC | 4.26167 | 73 (-14)                  | TGCA<br>TG | 3.76391 |
| 11 (-76)                  | CGGACA<br>T | 2.96466 | 29 (-58)                              | CGCCG<br>CT | 3.21040 | 40 (-47)                  | GTCCACC<br>T | 2.42696 | 66 (-21)                 | CTACT<br>CC | 4.26167 |                           |            |         |
|                           |             |         | 46 (-41)                              | CTGCC<br>TT | 2.41158 | 58 (-29)                  | GGCTACT<br>C | 3.48823 |                          |             |         |                           |            |         |
|                           |             |         |                                       |             |         | 61 (-26)                  | TACTCCT<br>A | 3.36043 |                          |             |         |                           |            |         |
|                           |             |         |                                       |             |         | 67 (-20)                  | TACTCCT<br>G | 3.81032 |                          |             |         |                           |            |         |
|                           |             |         |                                       |             |         | 78 (-9)                   | GGCCCTC<br>A | 3.62831 |                          |             |         |                           |            |         |
|                           |             |         |                                       |             |         | 79 (-8)                   | GCCCTCA      | 2.63323 |                          |             |         |                           |            |         |

Supplementary Table 2.

**C**

**DMPK e15** (coding sequence only):  
 GTCCTAGGCCTGGCCTATCGGAGGCGCTTCCCTGCTCCTGTTCCGCGTTGTTCTGTCTCGTGCCGCGCCCTGGGCTGCATTGGTTGGTGGCCACGCCGCAACTCACCACA  
 GTCTGCGCCGCCAGGAGCCGCCGCGCTCCCTGA

| SRSF1<br>threshold: 1.956 |             |         | SRSF1 (IgM-BRCA1)<br>threshold: 1.867 |             |         | SRSF2<br>threshold: 2.383 |              |         | SRSF5<br>threshold: 2.67 |             |         | SRSF6<br>threshold: 2.676 |            |         |
|---------------------------|-------------|---------|---------------------------------------|-------------|---------|---------------------------|--------------|---------|--------------------------|-------------|---------|---------------------------|------------|---------|
| Position*/Site/Score      |             |         | Position*/Site/Score                  |             |         | Position*/Site/Score      |              |         | Position*/Site/Score     |             |         | Position*/Site/Score      |            |         |
| 20 (-134)                 | CGGAGG<br>C | 3.08488 | 20 (-134)                             | CGGAGG<br>C | 3.68554 | 1 (-153)                  | GTCCCTA<br>G | 3.05185 | 2 (-152)                 | TCCCTA<br>G | 3.11530 | 63 (-91)                  | TGCCG<br>C | 3.01803 |
| 45 (-109)                 | CGCCGT<br>T | 2.07093 | 37 (-117)                             | CTCCTG<br>T | 2.52436 | 29 (-125)                 | TTTCCCT<br>G | 3.18541 | 15 (-139)                | CCTATC<br>G | 2.80006 | 79 (-75)                  | TGCAT<br>T | 2.96614 |
| 69 (-85)                  | CGCCCT<br>G | 2.30151 | 45 (-109)                             | CGCCGT<br>T | 3.31440 | 35 (-119)                 | TGCTCCT<br>G | 4.17117 | 31 (-123)                | TCCCTG<br>C | 2.84049 |                           |            |         |
| 95 (-59)                  | CCCACG<br>C | 2.65699 | 65 (-89)                              | CCGCCG<br>C | 2.50941 | 42 (-112)                 | GTTCCGC<br>G | 3.69293 | 56 (-98)                 | TGTCTC<br>G | 3.90423 |                           |            |         |
| 99 (-55)                  | CGCCGG<br>C | 2.33756 | 66 (-88)                              | CGCCGC<br>C | 2.01370 | 57 (-97)                  | GTCTCGT<br>G | 4.65783 | 108 (-46)                | ACTCAC<br>C | 3.07925 |                           |            |         |
| 102 (-52)                 | CGGCCA<br>A | 2.32435 | 68 (-86)                              | CGCCC<br>T  | 2.05880 | 63 (-91)                  | TGCCGC<br>CG | 2.85990 | 110 (-44)                | TCACCG<br>C | 3.74479 |                           |            |         |
| 109 (-45)                 | CTCACC<br>G | 2.16204 | 69 (-85)                              | CGCCCT<br>G | 3.31465 | 86 (-68)                  | GGTTGGT<br>G | 3.83890 | 117 (-37)                | AGTCTG<br>G | 3.16024 |                           |            |         |
| 111 (-43)                 | CACCGC<br>A | 2.41369 | 71 (-83)                              | CCCTGG<br>G | 2.41702 | 93 (-61)                  | GGCCA<br>CG  | 4.53042 |                          |             |         |                           |            |         |
| 129 (-25)                 | CCCAGG<br>A | 4.25952 | 95 (-59)                              | CCCACG<br>C | 3.29648 | 118 (-36)                 | GTCTGGC<br>G | 3.11571 |                          |             |         |                           |            |         |
| 138 (-16)                 | CGCCCG<br>C | 2.94168 | 99 (-55)                              | CGCCGG<br>C | 3.66101 | 138 (-16)                 | CGCCCG<br>CG | 2.86339 |                          |             |         |                           |            |         |
|                           |             |         | 102 (-52)                             | CGGCCA<br>A | 3.13241 | 145 (-9)                  | GCTCCCT<br>G | 3.84665 |                          |             |         |                           |            |         |
|                           |             |         | 109 (-45)                             | CTCACC<br>G | 2.88698 |                           |              |         |                          |             |         |                           |            |         |
|                           |             |         | 111 (-43)                             | CACCGC<br>A | 3.13987 |                           |              |         |                          |             |         |                           |            |         |
|                           |             |         | 114 (-40)                             | CGCAGT<br>C | 2.52351 |                           |              |         |                          |             |         |                           |            |         |
|                           |             |         | 124 (-30)                             | CGCCGC<br>C | 2.01370 |                           |              |         |                          |             |         |                           |            |         |
|                           |             |         | 126 (-28)                             | CGCCC<br>A  | 2.28650 |                           |              |         |                          |             |         |                           |            |         |
|                           |             |         | 127 (-27)                             | CGCCA<br>G  | 3.07831 |                           |              |         |                          |             |         |                           |            |         |
|                           |             |         | 129 (-25)                             | CCCAGG<br>A | 4.51294 |                           |              |         |                          |             |         |                           |            |         |
|                           |             |         | 138 (-16)                             | CGCCCG<br>C | 3.86893 |                           |              |         |                          |             |         |                           |            |         |
|                           |             |         |                                       | CTCCCT      |         |                           |              |         |                          |             |         |                           |            |         |

**Supplementary Table 2.**

**Tabular output of ESE analyses within DMPK e5 (A), e9 (B) and e15 (C).** Putative ESEs were determined using ESEfinder 3.0 (34,35). The score values (relative to default threshold values) of ESEs corresponding to different SRSF are listed. Both positions from 5' end and 3' end (marked with "-") of the analyzed exonic sequence are given.

| PCR target           | Assay                                                                                      | Primer set   | 5'-3' sequence             |
|----------------------|--------------------------------------------------------------------------------------------|--------------|----------------------------|
| <b>DMPK Δe5</b>      | AON-induced e5 skipping; <i>DMPK</i> mRNA expression                                       | DMPK_e4F     | AGAGGGACGTGTTGGTGAAT       |
|                      |                                                                                            | DMPK_e7R     | GATCTCGGGGGACAGGTAGT       |
| <b>DMPK Δe9</b>      | AON-induced e9 skipping; <i>DMPK</i> mRNA expression                                       | DMPK_e8F     | CCTTCTTCTTTGGCCTCGAC       |
|                      |                                                                                            | DMPK_e10R    | CTTGCACGTGTGGCTCAAG        |
| <b>DMPK Δe15</b>     | AON-induced e15 skipping                                                                   | DMPK_10F     | CCTGGAGGAGGAGGTGCT         |
|                      |                                                                                            | DMPK_558R    | CTTTGCGAACCAACGATAGG       |
| <b>DMPK 3'UTR</b>    | <i>DMPK</i> mRNA expression [qPCR]                                                         | DMPK 3'UTR_F | GCGATCTCTGCCTGCTTACT       |
|                      |                                                                                            | DMPK 3'UTR_R | GTCCTAGGTGGGGACAGACA       |
| <b>DMPK e9-e10</b>   | <i>DMPK</i> total mRNA expression (e9-e10);<br>+e9 mRNA expression                         | N11          | CACTGTCCGACATTCGGGAAGGTGC  |
|                      |                                                                                            | 133          | GCTTGCACGTGTGGCTCAAGCAGCTG |
| <b>DMPK +e5 mRNA</b> | <i>DMPK</i> total mRNA expression (e5-e7);<br>+e5 mRNA expression                          | DMPK_e5-F    | CTTCTACCTGGCGGAGATTG       |
|                      |                                                                                            | DMPK_e7-R    | GATCTCGGGGGACAGGTAGT       |
| <b>CELF1 3'UTR</b>   | mRNA expression                                                                            | CBP1_F       | CCAAGGACCTGGTCTGAAAA       |
|                      |                                                                                            | CBP1_R       | ATCCCTGGGAGGACTTTCAT       |
| <b>GAPDH</b>         | mRNA expression                                                                            | GAPDH_F      | CATCAATGGAAATCCCATCAC      |
|                      |                                                                                            | GAPDH_R      | GGTTTTTCTAGACGGCAGGTC      |
| <b>i14/e15/CUG</b>   | AON-induced splicing out of <i>DMPK</i> pre-mRNA<br>fragment containing i14/e15/CUG [qPCR] | DMPK_i 14F   | AGTCCCAGGAGCCAATCAG        |
|                      |                                                                                            | DMPK_e15R    | CCCGGAGTCGAAGACAGTTC       |
| <b>DMPK i9-e10</b>   | pre-mRNA expression (i9-e10) [qPCR]                                                        | DMPK_i9F     | CATTCTGTCTCCCTCCCCAC       |
|                      |                                                                                            | DMPK_e10R    | CTTGCACGTGTGGCTCAAG        |
| <b>MBNL1 e1</b>      | alternative splicing                                                                       | HuEx1_F1     | CAGCGACATGCAACAGTCTT       |
|                      |                                                                                            | HuEx1_R1     | TGTCAGCAGGATGAGCAAAC       |
| <b>MBNL1 e5</b>      | alternative splicing                                                                       | MBNL1_F      | ACCAACAGGCTCTAGCCAACATGC   |
|                      |                                                                                            | MBNL1_R      | CGTCCTTTACTCTAACCAAGC      |
| <b>MBNL2 e7</b>      | alternative splicing                                                                       | MBNL2_F      | GCTGCCCAATACCAGGTCAAC      |
|                      |                                                                                            | MBNL2_R      | TGGTGGGAGAAATGCTGTATGC     |
| <b>NCOR2 e45a</b>    | alternative splicing                                                                       | NCOR2_F      | ACACCCACAACCGGAATGAGCCTG   |
|                      |                                                                                            | NCOR2_R      | GGACTTGGCTTTTCGGCTGCTG     |

**Supplementary Table 3.**

**PCR primers used for alternative splicing assays and gene expression analyses.** Assay, PCR targets as well as 5'-3' sequences are indicated for each primer pair.
